# Supplementary material for: A 1500-year multiproxy record of coastal hypoxia from the northern Baltic Sea indicates unprecedented deoxygenation over the 20 th century
Source: Copernicus journal article supplement (doi:10.5194/bg-2018-25), 2018-01-16
Supplement: Supplementary file 1 [file bg-2018-25-supplement.pdf]

1

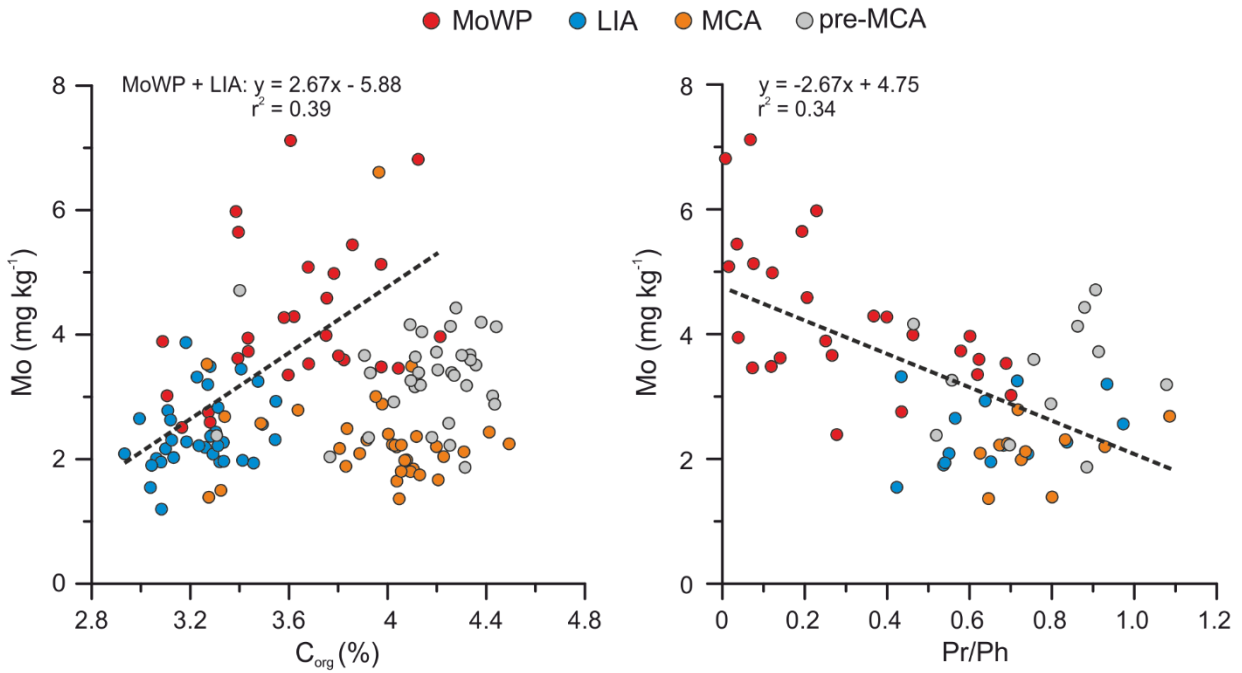

2

3 **Fig. S1.** Crossplots for Mo content against  $C_{org}$  content and Pr/Ph ratio. For Mo vs.  $C_{org}$ , a linear regression  
4 for the samples post-dating the MCA is shown, while for Mo vs. Pr/Ph a regression for the entire data set is  
5 presented.

6

7

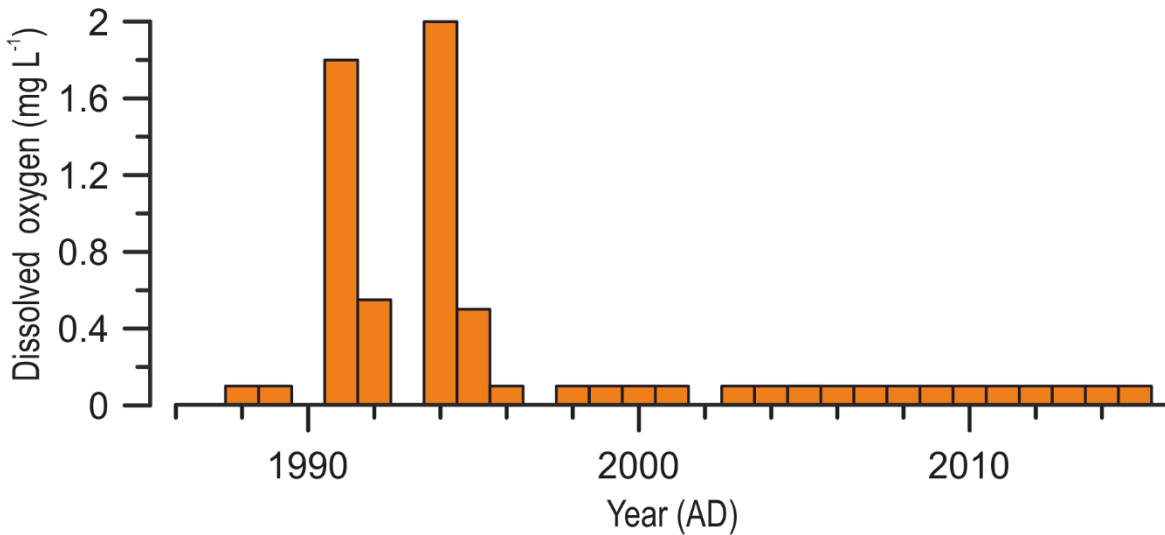

8

9 **Fig S2.** Near-bottom water (1 m above seabed) dissolved oxygen concentrations at the study site in August  
10 from 1988 to 2015 AD (data from HERTTA database: [www.syke.fi/avoindata](http://www.syke.fi/avoindata)). The values at 0.1 mg L<sup>-1</sup>  
11 represent concentrations below the detection limit (0.2 mg L<sup>-1</sup>).
